# Supplementary material for: Inner membrane YfgM–PpiD heterodimer acts as a functional unit that associates with the SecY/E/G translocon and promotes protein translocation
Source: PubMed Central journal article supplement (PMC9643414; doi:10.1016/j.jbc.2022.102572), 2022-10-07
Supplement: mmc1.pdf [file mmc1.pdf]

## **Supporting information**

### **Inner membrane YfgM–PpiD heterodimer acts as a functional unit that associates with the SecY/E/G translocon and promotes protein translocation**

Ryoji Miyazaki<sup>1</sup>, Mengting Ai<sup>2, #</sup>, Natsuko Tanaka<sup>2, #</sup>, Takehiro Suzuki<sup>3</sup>, Naoshi Dhomae<sup>3</sup>, Tomoya Tsukazaki<sup>1</sup>, Yoshinori Akiyama<sup>2</sup>, Hiroyuki Mori<sup>2,\*</sup>

#### **Material included:**

- Supporting discussion (page S-2)**
- Supporting experimental procedures (pages S-3 and S-4)**
- Table S1 (page S-5)**
- Table S2 (pages S-6 – S-8)**
- Table S3 (page S-9)**
- Figure S1 (page S-10)**
- Figure S2 (page S-11)**
- Figure S3 (page S-12)**
- Figure S4 (page S-13)**
- Figure S5 (page S-14)**
- Figure S6 (page S-15)**
- Figure S7 (page S-16)**
- Figure S8 (page S-17)**
- Figure S9 (page S-18)**
- Figure S10 (page S-19)**
- Figure S11 (page S-20)**
- File S1 (PDB format)**
- File S2 (PDB format)**

## Supporting Discussion

### Different requirement of the PpiD/YfgM complex for the TTAC of monitoring substrates

Requirement of the PpiD/YfgM complex for the TTAC of VemP is consistent with the previous observations that the TTAC of VemP specifically occurs at a late step of its translocation on the SecY/E/G complex after processing of its signal sequence (36), and that PpiD cooperatively functions with SecD to mediate the TTAC of VemP (28). On the other hand, Jauss *et al.* reported that the TTAC of the LepB-SecM chimeric protein normally undergoes even in the absence of both of YfgM and PpiD (48). This results could also match the finding that the TTAC of SecM, another monitoring substrate, occurs at an early step of its translocation before its signal sequence cleavage (36), where the PpiD/YfgM complex is presumably unable to function. The difference of these monitoring substrates in the timing of the TTAC could have been evolved to be suitable for their physiological functions. Indeed, to delay the timing of the TTAC, VemP would have acquired the Arg-85 residue essential for the SecD/PpiD-dependent arrest cancelation (28), although the detail molecular mechanism remains unsolved. As a result, VemP could specifically monitor the activity of SecD/F that plays a role in a late step of translocation (27) and SecM could monitor the activity of SecA, the essential motor ATPase acting at an initial step of translocation (56).

### Reliability of the AI-predicted model structure

The previous *in vivo* photo-crosslinking study showed that several amino acid residues in the TM segments of SecY contacted with PpiD (24). Mapping of these residues on the AI-predicted PpiD/YfgM-SecY/E/G super-complex structure (magenta in **Fig. S10**) reveals that almost all of the identified PpiD-neighbor residues, except for the Leu-320 in SecY, are in close proximity to PpiD, suggesting that the model structure is highly reliable. Since the interactions between SecY and PpiD should be not static but dynamic, it is supposed that the interaction between the Leu-320 of SecY and PpiD could occur at a different conformational state of the complex. On the other hand, another *in vivo* photo-crosslinking study indicated that many residues in the plug helix in SecY also interacted with PpiD (48). The fact that most of these residues are mapped to the positions distant from PpiD on the model structure (red in **Fig. S10**) might apparently undermine the credibility of the model structure. However, because it was reported that the plug helix has a highly dynamic nature (49) and dissociates from the pore-ring to generate a vertical pore, when protein translocation starts (1, 3), the positions of the plug helix in the SecY/E/G translocon should be different between in a resting state (crystal structure) and in functional states. During protein translocation, the plug helix would occupy several different positions in SecY/E/G. Under some conformational states, it could be in close proximity to PpiD. Thus, it is supposed that the AI-predicted model structure of PpiD/YfgM-SecY/E/G does not necessarily conflict with the crosslinking results, because the model structure would represent a resting state in which such large conformational changes of the plug helix have not been taken into consideration.

## Supporting Experimental Procedures

### Construction of Mutant Strains

NT17 (MC4100,  $\Delta ompT$ ) was constructed by transducing  $\Delta ompT::kan$  from JW0554 (57) to MC4100 (58) and then removing the *kan* cassette with pCP20 (59). NT23 (NT17,  $\Delta secG$ ) was constructed by transducing  $\Delta secG::kan$  from JW3142 (57) to NT17 and then removing the *kan* cassette with pCP20. NT31 (NT17,  $\Delta secG \Delta yfgM$ ) and NT35 (NT17,  $\Delta yfgM$ ) was constructed by transducing  $\Delta yfgM::kan$  from JW2497 (57) to NT23 and NT17, respectively, and then removing the *kan* cassette with pCP20. NT237 (NT17,  $\Delta secG \Delta ppiD$ ) was constructed by transducing  $\Delta ppiD::kan$  from JW0431 (57) to NT23 and then removing the *kan* cassette with pCP20. RM3688 (NT17,  $\Delta ppiD::kan$ ) and RM3690 (NT35,  $\Delta ppiD::kan$ ) were constructed by transducing  $\Delta ppiD::kan$  from JW0431 (57) to NT17 and NT35, respectively. HM5894 (NT17,  $ppiD-his_{10}::kan$ ) and HM5895 (NT17,  $\Delta yfgM ppiD-his_{10}::kan$ ) were constructed by transducing  $ppiD-his_{10}::kan$  from RM3032 (28) to NT17 and NT35, respectively.

NT134 (NT17,  $yfgM(TM f.s.) zff-208::Tn10$ ) was constructed as follows. HM3663 ( $polA1 zff-208::Tn10$ ) was transformed with a plasmid pHM764 (pK19mobsacB- $yfgM(TM f.s.)$ ) (see below) and a kanamycin (12.5  $\mu\text{g}/\text{mL}$ )-resistant strain, in which pHM764 had been integrated into the chromosome by single crossover homologous recombination, was obtained. Then, the strain in which the plasmid sequence was excised was selected by growing the pHM764-integrated strain on P medium (20 g/L polypeptone, 5 g/L NaCl; pH adjusted to 7.2 by using NaOH) with 5% sucrose at 37 °C. One of the segregants that had the  $yfgM(TM f.s.)$  mutations on the chromosome was used as a donor in P1 transduction to transfer  $yfgM(TM f.s.)$  to NT17, yielding NT134. NT135 (NT17,  $yfgM^+ zff-208::Tn10$ ) was obtained as an isogenic  $yfgM^+$  strain of NT134.

*Vibrio* mutant strain RMV6 was constructed using a “suicide vector”, pSW7848, carrying the toxin-encoding *ccdB* gene under the arabinose promoter control (27). 150  $\mu\text{L}$  of an overnight culture of *E. coli*  $\beta$ 3914 cells harboring pRM742 (pSW7848- $\Delta Va.yfgM$ ) was mixed with 50  $\mu\text{L}$  of an overnight culture of *V. alginolyticus* VIO5 strain. Cells were harvested and resuspended in 100  $\mu\text{L}$  of the VC medium and 2.5  $\mu\text{L}$  of the suspension was spotted on the VC agar medium containing 300  $\mu\text{M}$  2,6-diaminopimelic acid (DAP) and incubated at 30 °C for 6 h. Then the grown cells were streaked on a VC plate containing 2.5  $\mu\text{g}/\text{mL}$  chloramphenicol but not containing DAP to select *Vibrio* cells in which the plasmid had been integrated on the chromosome. Subsequently, the chloramphenicol-resistant bacteria were grown on VC agar plates containing 0.2% arabinose instead of glucose to counter-select the plasmid-integrated *Vibrio* cells. After confirmation of chloramphenicol-sensitivity and arabinose resistance of the obtained cells, presence of the introduced mutations was confirmed by colony PCR.

### Plasmids Construction

pNT16 (pMW118- $yfgM-his_6$ ) was constructed as follows. A  $yfgM-his_6$  fragment was PCR-amplified from genomic DNA prepared from MC4100 using the primers, *yfgM-f* and *yfgM-his<sub>6</sub>-r*, digested with KpnI and HindIII, and cloned into the same sites of pMW118. pRM693 (pMW118- $yfgM-his_{10}$ ) was constructed from pNT16 by site-directed mutagenesis using a pair of appropriate primers. pMW118- $yfgM(amb)-his_{10}$  plasmids were constructed from pRM693 by site-directed mutagenesis using a pair of appropriate primers. pNT9 (pTWV228- $yfgM-flag$ ) was constructed as follows. A  $yfgM-flag$  fragment was PCR-amplified from the genomic DNA prepared from MC4100 using the primers, *yfgM-f* and *yfgM-flag-r*, digested with KpnI and SphI, and cloned into the same sites of pTWV228. pTWV228- $yfgM(amb)-flag$  plasmids were constructed from pNT9 by site-directed mutagenesis using a pair of appropriate primers.

pRM899 (pHM1021- $ppiD-his_{10}$ ) was constructed as follows. A  $ppiD-his_{10}$  fragment was PCR-amplified from MC4100 genome using *ppiD-f* and *ppiD-his<sub>10</sub>-r* primers, digested with NcoI and BamHI and cloned into the same sites of pTV118N (Takara Bio). The  $ppiD-his_{10}$  fragment of the resultant plasmid was then sub-cloned into the same sites of

pHM1021(27). pHM1021-*ppiD(amb)-his<sub>10</sub>* plasmids were constructed from pRM899 by site-directed mutagenesis using a pair of appropriate primers.

pGK52 (pTWV228-*secG(M52amber)*) was constructed from pTWV228-*secG* (lab stock) by site-directed mutagenesis using a pair of appropriate primers. pNT1 (pTWV228-*secG(M52amber)-his<sub>6</sub>*) was constructed as follows. A *secG(M52amber)-his<sub>6</sub>* fragment was PCR-amplified from pGK52 using the primers, RV-N and *secG-his<sub>6</sub>-r*, digested with *SacI* and *HindIII*, and cloned into the same sites of pTWV228.

pHM1258 (pHM1021-*vemP-phoA*) was constructed as follows. A *NcoI*-*MfeI* fragment prepared from pTS48 (pTWV228-*vemP-f3m*) (28) was cloned into the same sites of pHM1144 (pHM1021- $\Delta$ *ss-vemP-lacZ*) (36) yielding pEI214. Separately, a DNA fragment encoding the mature region of *PhoA* (22-471) was PCR-amplified from the genomic DNA prepared from *E. coli* AD16 (60) using the primers, *PhoA*-*BamHI-F2* and *PhoA*-*HindIII-R*, digested with *BamHI* and *HindIII* and cloned into the same sites of pEI214 to obtain pEI234. A *NcoI* site in the *phoA* region of pEI234 was mutated without causing an amino acid substitution by site-directed mutagenesis using a pair of appropriate primers to obtain pHM1258. pHM1550 (pMW118 (*Spc*)) was constructed as follows. A 2.1 Kbp *HindIII* fragment containing a *spc<sup>R</sup>* gene was prepared from pHM45 $\Omega$  (61). Separately, a vector fragment without a *bla* gene was PCR-amplified from pMW118 using the pair of primers, pMW-*Spc*-for and pMW-*Spc*-rev. The *spc<sup>R</sup>* gene fragment and the pMW118-derived fragment were connected using In-Fusion® HD cloning kit (Clontech) to obtain pHM1548. Then, a unique *NcoI* site was introduced at the start codon of *lacZ $\alpha$*  of pHM1548 by site-directed mutagenesis using a pair of appropriate primers to generate pHM1550. pHM1552 (pHM1550-*vemP-phoA*) was constructed as follows. A *NcoI*-*HindIII* fragment containing the *vemP-phoA* gene was prepared from pHM1258 and cloned into the same sites of pHM1550 to obtain pHM1552.

pHM764 (pK19mobsacB-*hisS-yfgM(TM f.s.)-bamB*) used for construction of NT134 (NT17, *yfgM(TM f.s.) zff-208::Tn10*) was constructed as follows. First, an about 3 kbp fragment containing *hisS-yfgM-bamB* genes was PCR-amplified from the genomic DNA prepared from MC4100 using *hisS-f* and *bamB-r* primers, digested with *Sall* and *SphI*, and cloned into the same sites of pK18mobsacB to obtain pHM763. Next, the frame shift mutations in *yfgM* shown in Fig. 1D were introduced into the pHM763 by two successive site-directed mutagenesis reactions using the pair of primers, G ins-f and its complementary oligonucleotide and another pair of primers, C del-f and its complementary oligonucleotide to obtain pHM764.

pRM742 used for construction of RMV6 (VIO5,  $\Delta$ *yfgM*) was constructed as follow. First, a DNA fragment containing the *V.yfgM* gene with (~1 kb) upstream and downstream sequences was amplified from the genome of VIO5 using *Va-yfgM-f* and *Va-yfgM-r* primers, and ligated with the *BamHI*- and *Sall*-digested pUC118 fragment using In-Fusion HD cloning Kit to generate pRM735. Next, a DNA fragment of the entire vector sequence with the *V.yfgM*-upstream sequence at one end and the *V.yfgM*-downstream sequence at the other end was amplified from pRM735 by PCR using *del-Va-yfgM-f* and *del-Va-yfgM-r* primers, and self-ligated using In-Fusion HD cloning Kit to produce pRM738. Finally, ~2 kbp DNA fragment containing *V.ppiD*-upstream and -downstream regions was amplified from a pRM738 using *pSW-yfgM-f* and *pSW-yfgM-r* primers, and ligated with the *NaeI*-digested pSW7848 using In-FusionR HD cloning Kit to yield pRM742.

**Table S1. Strains used in this study.****(A) *E. coli* strains**

| Strain | Genotype                                                                                                        | Reference  |
|--------|-----------------------------------------------------------------------------------------------------------------|------------|
| MC4100 | F <sup>-</sup> <i>araD139</i> $\Delta$ ( <i>argF-lac</i> ) <i>U169 rpsL150 relA1 flbB5301 deoC1 ptsF25 rbsR</i> | (58)       |
| NT17   | MC4100, $\Delta$ <i>ompT</i>                                                                                    | This study |
| NT35   | NT17, $\Delta$ <i>yfgM</i>                                                                                      | This study |
| RM3688 | NT17, $\Delta$ <i>ppiD::kan</i>                                                                                 | This study |
| RM3690 | NT17, $\Delta$ <i>yfgM</i> $\Delta$ <i>ppiD::kan</i>                                                            | This study |
| NT135  | NT17, <i>yfgM</i> <sup>+</sup> <i>zff-208::Tn10</i>                                                             | This study |
| NT134  | NT17, <i>yfgM</i> ( <i>TM f.s.</i> ) <i>zff-208::Tn10</i>                                                       | This study |
| HM5894 | NT17, <i>ppiD-his10::kan</i>                                                                                    | This study |
| HM5895 | NT17, $\Delta$ <i>yfgM</i> <i>ppiD-his10::kan</i>                                                               | This study |
| NT23   | NT17, $\Delta$ <i>secG</i>                                                                                      | This study |
| NT31   | NT17, $\Delta$ <i>secG</i> $\Delta$ <i>yfgM</i>                                                                 | This study |
| NT237  | NT17, $\Delta$ <i>secG</i> $\Delta$ <i>ppiD</i>                                                                 | This study |
| AD202  | MC4100, <i>ompT::kan</i>                                                                                        | (62)       |
| SA101  | AD202, <i>secG::kan zha-203::Tn10</i>                                                                           | (63)       |

**(B) *V. alginolyticus* strains**

| Strain | Genotype                                                 | Reference  |
|--------|----------------------------------------------------------|------------|
| VIO5   | 138-2 Rif <sup>R</sup> Pof <sup>+</sup> Laf <sup>-</sup> | (64)       |
| NR23   | VIO5, $\Delta$ <i>V.secD1/F1::kan</i>                    | (27)       |
| HM3740 | VIO5, $\Delta$ <i>V.secD2/F2::kan</i>                    | (27)       |
| RMV2   | VIO5, $\Delta$ <i>V.ppiD</i>                             | (28)       |
| RMV6   | VIO5, $\Delta$ <i>V.yfgM</i>                             | This study |

**Table S2. Plasmids used in this study.**

| Plasmid    | Vector | Encoded gene and description                                                                                                                       | Reference or source |
|------------|--------|----------------------------------------------------------------------------------------------------------------------------------------------------|---------------------|
| pEVOL-pBpF |        | p15A-derivative encoding an evolved <i>M. jannaschii</i> aminoacyl-tRNA synthetase/suppressor tRNA pair for incorporation of pBPA; Cm <sup>R</sup> | (65)                |
| pHM649     |        | p15A-derivative encoding an evolved <i>M. jannaschii</i> aminoacyl-tRNA synthetase/suppressor tRNA pair for incorporation of pBPA; Cm <sup>R</sup> | (66)                |
| pMW118     |        | Expression vector; P <sub>lac</sub> , Amp <sup>R</sup>                                                                                             | Takara Bio          |
| pRM693     | pMW118 | <i>yfgM-his10</i>                                                                                                                                  | This study          |
| pRM694     | pMW118 | <i>yfgM(N6amb)-his10</i>                                                                                                                           | This study          |
| pRM695     | pMW118 | <i>yfgM(V11amb)-his10</i>                                                                                                                          | This study          |
| pRM696     | pMW118 | <i>yfgM(R16amb)-his10</i>                                                                                                                          | This study          |
| pRM697     | pMW118 | <i>yfgM(N21amb)-his10</i>                                                                                                                          | This study          |
| pRM698     | pMW118 | <i>yfgM(A26amb)-his10</i>                                                                                                                          | This study          |
| pRM699     | pMW118 | <i>yfgM(L31amb)-his10</i>                                                                                                                          | This study          |
| pRM700     | pMW118 | <i>yfgM(L36amb)-his10</i>                                                                                                                          | This study          |
| pRM701     | pMW118 | <i>yfgM(Y41amb)-his10</i>                                                                                                                          | This study          |
| pRM702     | pMW118 | <i>yfgM(Q46amb)-his10</i>                                                                                                                          | This study          |
| pRM703     | pMW118 | <i>yfgM(R51amb)-his10</i>                                                                                                                          | This study          |
| pRM704     | pMW118 | <i>yfgM(A56amb)-his10</i>                                                                                                                          | This study          |
| pRM705     | pMW118 | <i>yfgM(V61amb)-his10</i>                                                                                                                          | This study          |
| pRM706     | pMW118 | <i>yfgM(E66amb)-his10</i>                                                                                                                          | This study          |
| pRM707     | pMW118 | <i>yfgM(S71amb)-his10</i>                                                                                                                          | This study          |
| pRM708     | pMW118 | <i>yfgM(E76amb)-his10</i>                                                                                                                          | This study          |
| pRM709     | pMW118 | <i>yfgM(E81amb)-his10</i>                                                                                                                          | This study          |
| pRM710     | pMW118 | <i>yfgM(Y86amb)-his10</i>                                                                                                                          | This study          |
| pRM711     | pMW118 | <i>yfgM(S91amb)-his10</i>                                                                                                                          | This study          |
| pRM712     | pMW118 | <i>yfgM(Q96amb)-his10</i>                                                                                                                          | This study          |
| pRM713     | pMW118 | <i>yfgM(K101amb)-his10</i>                                                                                                                         | This study          |
| pRM714     | pMW118 | <i>yfgM(K106amb)-his10</i>                                                                                                                         | This study          |
| pRM715     | pMW118 | <i>yfgM(L111amb)-his10</i>                                                                                                                         | This study          |
| pRM716     | pMW118 | <i>yfgM(A116amb)-his10</i>                                                                                                                         | This study          |
| pRM717     | pMW118 | <i>yfgM(E121amb)-his10</i>                                                                                                                         | This study          |
| pRM718     | pMW118 | <i>yfgM(V126amb)-his10</i>                                                                                                                         | This study          |
| pRM719     | pMW118 | <i>yfgM(L131amb)-his10</i>                                                                                                                         | This study          |
| pRM720     | pMW118 | <i>yfgM(V136amb)-his10</i>                                                                                                                         | This study          |

|             |             |                                                                                   |            |
|-------------|-------------|-----------------------------------------------------------------------------------|------------|
| pRM721      | pMW118      | <i>yfgM(A141amb)-his<sub>10</sub></i>                                             | This study |
| pRM722      | pMW118      | <i>yfgM(K146amb)-his<sub>10</sub></i>                                             | This study |
| pRM723      | pMW118      | <i>yfgM(I151amb)-his<sub>10</sub></i>                                             | This study |
| pRM724      | pMW118      | <i>yfgM(W156amb)-his<sub>10</sub></i>                                             | This study |
| pRM725      | pMW118      | <i>yfgM(A161amb)-his<sub>10</sub></i>                                             | This study |
| pRM726      | pMW118      | <i>yfgM(E166amb)-his<sub>10</sub></i>                                             | This study |
| pRM727      | pMW118      | <i>yfgM(K171amb)-his<sub>10</sub></i>                                             | This study |
| pRM728      | pMW118      | <i>yfgM(G176amb)-his<sub>10</sub></i>                                             | This study |
| pRM729      | pMW118      | <i>yfgM(W181amb)-his<sub>10</sub></i>                                             | This study |
| pRM730      | pMW118      | <i>yfgM(K186amb)-his<sub>10</sub></i>                                             | This study |
| pRM731      | pMW118      | <i>yfgM(P191amb)-his<sub>10</sub></i>                                             | This study |
| pRM732      | pMW118      | <i>yfgM(M196amb)-his<sub>10</sub></i>                                             | This study |
| pRM733      | pMW118      | <i>yfgM(I201amb)-his<sub>10</sub></i>                                             | This study |
| pRM734      | pMW118      | <i>yfgM(I206amb)-his<sub>10</sub></i>                                             | This study |
| pHM1021     |             | Expression vector; P <sub>lac</sub> , Amp <sup>R</sup>                            | (27)       |
| pTS48       | pHM1021     | <i>vemP-3xflag-myc</i>                                                            | (28)       |
| pRM899      | pHM1021     | <i>ppiD-his<sub>10</sub></i>                                                      | This study |
| pRM978      | pHM1021     | <i>ppiD(F122amb)-his<sub>10</sub></i>                                             | This study |
| pRM947      | pHM1021     | <i>ppiD(F174amb)-his<sub>10</sub></i>                                             | This study |
| pRM948      | pHM1021     | <i>ppiD(I599amb)-his<sub>10</sub></i>                                             | This study |
| pRM949      | pHM1021     | <i>ppiD(V600amb)-his<sub>10</sub></i>                                             | This study |
| pTWV228     |             | Expression vector; P <sub>lac</sub> , Amp <sup>R</sup>                            | Takara Bio |
| pNT9        | pTWV228     | <i>yfgM-flag</i>                                                                  | This study |
| pAI20       | pTWV228     | <i>yfgM(V11amb)-flag</i>                                                          | This study |
| pAI13       | pTWV228     | <i>yfgM(L36amb)-flag</i>                                                          | This study |
| pAI14       | pTWV228     | <i>yfgM(R51amb)-flag</i>                                                          | This study |
| pAI15       | pTWV228     | <i>yfgM(Y86amb)-flag</i>                                                          | This study |
| pAI16       | pTWV228     | <i>yfgM(Q96amb)-flag</i>                                                          | This study |
| pAI21       | pTWV228     | <i>yfgM(L111amb)-flag</i>                                                         | This study |
| pAI17       | pTWV228     | <i>yfgM(V126amb)-flag</i>                                                         | This study |
| pAI18       | pTWV228     | <i>yfgM(W156amb)-flag</i>                                                         | This study |
| pAI22       | pTWV228     | <i>yfgM(W181amb)-flag</i>                                                         | This study |
| pAI19       | pTWV228     | <i>yfgM(M196amb)-flag</i>                                                         | This study |
| pNT1        | pTWV228     | <i>secG(M52amb)-his<sub>6</sub></i>                                               | This study |
| pHM1550     |             | Expression vector; P <sub>lac</sub> , Spc <sup>R</sup>                            | This study |
| pHM1552     | pHM1550     | <i>vemP-phoA</i>                                                                  | This study |
| pK18mobsacB |             | vector for chromosomal gene replacement<br>carrying <i>sacB</i> ; Km <sup>R</sup> | (67)       |
| pHM764      | pK19mobsacB | <i>hisS yfgM (TM f.s.) bamB</i>                                                   | This study |

|         |         |                                                                                                |            |
|---------|---------|------------------------------------------------------------------------------------------------|------------|
| pUC118  |         | Expression vector; P <sub>lac</sub> , Amp <sup>R</sup>                                         | Takara Bio |
| pRM735  | pUC118  | <i>Va.yfgM</i> +up- & down-stream 1kb                                                          | This study |
| pRM738  | pUC118  | $\Delta Va.yfgM$ +up- & down-stream 1kb                                                        | This study |
| pSW7848 |         | R6K $\gamma$ -ori-based suicide vector, P <sub>araBAD</sub> -<br><i>ccdB</i> , Cm <sup>R</sup> | (68)       |
| pRM742  | pSW7848 | $\Delta Va.yfgM$ +up- & down-stream 1kb                                                        | This study |

---



**Table S3. Primers used in this study.**

| Name                      | Sequence (5' to 3')                                           |
|---------------------------|---------------------------------------------------------------|
| yfgM-f                    | AATAATGGTACCGGGTTAAGGAAGGAGAAGGAC                             |
| yfgM-his <sub>6</sub> -r  | AGTGCCAAGCTCAATGGTGTGGTGTGGTGGATGGACAAATTATTAATTTT            |
| yfgM-flag-r               | ATAATAGCATGCTCATTGTCTGCTGCTCTTTATAGTCGATGGACAAATTATTAATTTT    |
| ppiD-f                    | GCGCCCATGGCGATGGACAGCTTACGCACG                                |
| ppiD-his <sub>10</sub> -r | GCGCGGATCCTTAATGATGATGATGATGATGATGATGATGATGATGTTGCTGTTCCAGCGC |
| RV-N                      | CAGGAAACAGCTATGAC                                             |
| secG-his <sub>6</sub> -r  | AGTGCCAAGCTTAGTGGTGTGGTGTGGTGGTTCCGGGATATCGCTGGTCCG           |
| PhoA-BamHI-F2             | AAAATAGGATCCGCGGACACCAGAAATGCC                                |
| PhoA-HindIII-R            | AAATAAGCTTTTATTTCAGCCCCAGAGCGG                                |
| pMW-Spc-for               | TACAAGCATAAAGCTGCATTGGTAACTGTCAGACC                           |
| pMW-Spc-rev               | TACAAGCATAAAGCTAGGGCGACACGAAATGTTG                            |
| hisS-f                    | CCCGCATGCCTCCCGAAACATTGAGGG                                   |
| bamB-r                    | GCCATTATACAGCACCGG                                            |
| G-ins-f                   | GCTGAAAATGGCAAGAGCACTGGCTGTTGG                                |
| G-ins-r                   | CCAACAGCCAGTGCTCTTGCCATTTTCAGC                                |
| C-del-f                   | CTGGCGCTACTGGAAAGCCATCAGGTTG                                  |
| C-del-r                   | CAACCTGATGGCTTTCCAGTAGCGCCAG                                  |
| Va-yfgM-f                 | CGGTACCCGGGGATCGTTTGGCCTTAACGGTCCTG                           |
| Va-yfgM-r                 | CGACTCTAGAGGATCTTGCCAACAATAACTGGCGC                           |
| del-Va-yfgM-f             | TTAAGAGGACAGGAAGGACCGCATTGGATGAAAAG                           |
| del-Va-yfgM-r             | TTCCTGTCTCTTAAAACATG                                          |
| pSW-yfgM-f                | TCTGCGAGGCTGGCCGTTTGGCCTTAACGGTCCTG                           |
| pSW-yfgM-r                | GATACCGTCGACGCCTTGCCAACAATAACTGGCGC                           |

# Figure S1

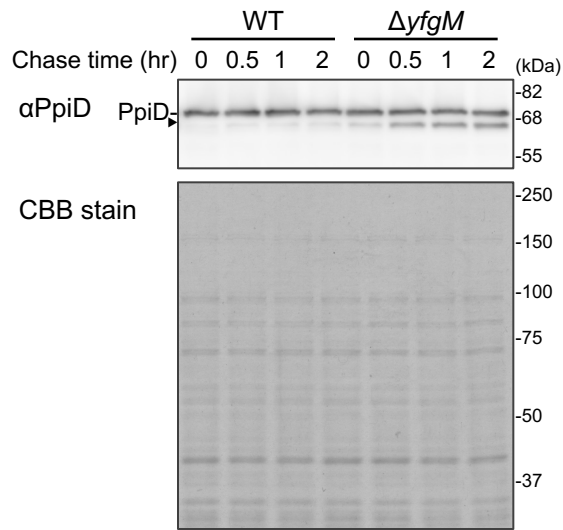

**Figure S1. The stability of PpiD in the  $\Delta yfgM$ -deficient strain.** NT17 (WT) and NT35 ( $\Delta yfgM$ ) cells were grown at 30 °C in LB medium for 2 h and spectinomycin (final concentration, 500  $\mu$ g/mL) was added at time 0. After cultivation at 37 °C for the indicated time periods, total cellular proteins were acid-precipitated and analyzed using SDS-PAGE, immunoblotting with anti-PpiD antibodies, and CBB staining. Black arrowheads indicate PpiD degradation products (PpiD').

# Figure S2

## A

[DNA sequence]

WT/*yfgM*<sup>+</sup>      AA-A/GCA/CTG (48bp) TGG/AAC/AGC  
*yfgM*(TM f.s.)    AAG/AGC/ACT (48bp) CTG/GAA/\_AGC

[Amino acid sequence]

YfgM(WT)            KALAVGVILGVGALIGWRYWNS  
YfgM(TM F.S.)      KSTGCWGD~~FGRWR~~TDWLALLES

## B

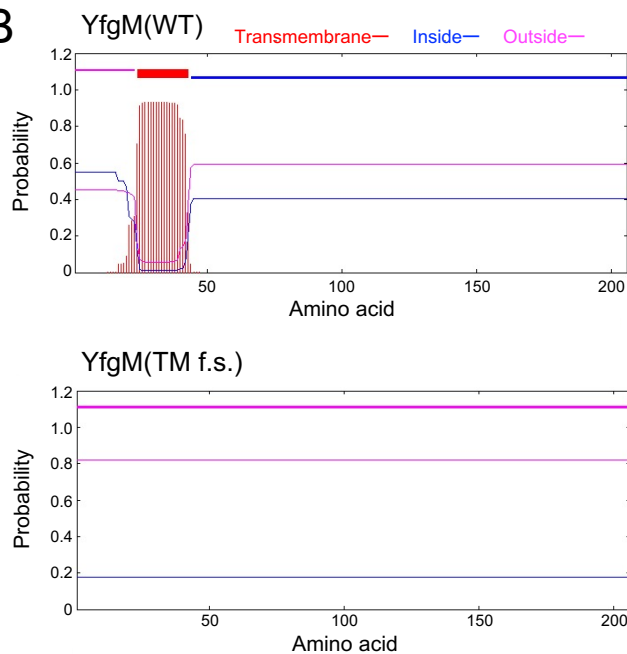

**Figure S2. TM helix region in YfgM and the corresponding region in the YfgM (TM F.S.) mutant.** *A*, nucleotide and amino acids sequences of the TM regions of wild-type YfgM and the corresponding region of YfgM (TM F.S.) mutant. Insertion and deletion mutations that cause a frame-shift are underlined. *B*, TM helix prediction in YfgM and the YfgM (TM F.S.) mutants. TM segments in YfgM and YfgM (TM F.S.) proteins were predicted from their amino acid sequences using the TMHMM-2.0 program (<https://services.healthtech.dtu.dk/service.php?TMHMM-2.0>).

# Figure S3

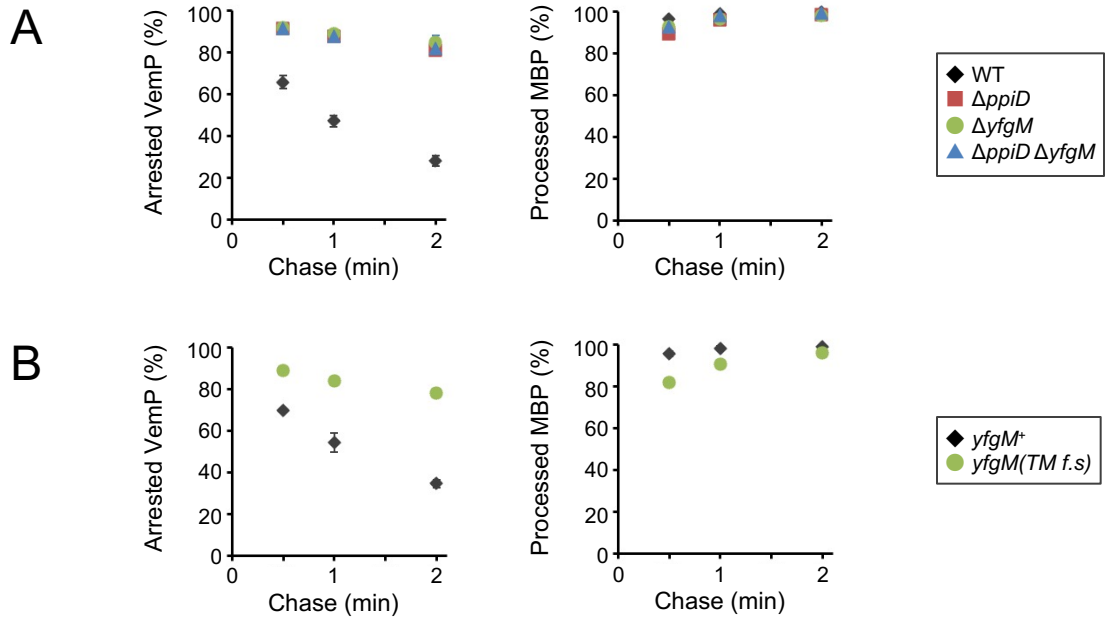

**Figure S3. Stability of the arrested VemP and export ability of MBP in  $\Delta yfgM$  and/or  $\Delta ppiD$  mutant cells.** The intensities of the VemP bands annotated as AP-unpro, AP-pro and FL mature in the upper gels and the MBP bands as precursor and mature in the lower gels of Figures 2A and 2B were quantitated and converted into relative molar amounts (RMA) using numbers of methionine residues in the species. Percentages of the arrested VemP and processed MBP were calculated by the following formulae.

$$\text{Arrested VemP (\%)} = 100 \times ([\text{AP-unpro}] + [\text{AP-pro}]) / ([\text{FL mature}] + [\text{AP-unpro}] + [\text{AP-pro}])$$

$$\text{Processed MBP (\%)} = 100 \times [\text{MBP-mature}] / ([\text{MBP-mature}] + [\text{MBP-precursor}])$$

[X] represents the RMA of the X molecules.

Average values of the arrest efficiency of VemP and the processing efficiency of MBP with S.D. ( $n \geq 2$ ) are plotted against the chase time and shown as the left and right graphs, respectively.

# Figure S4

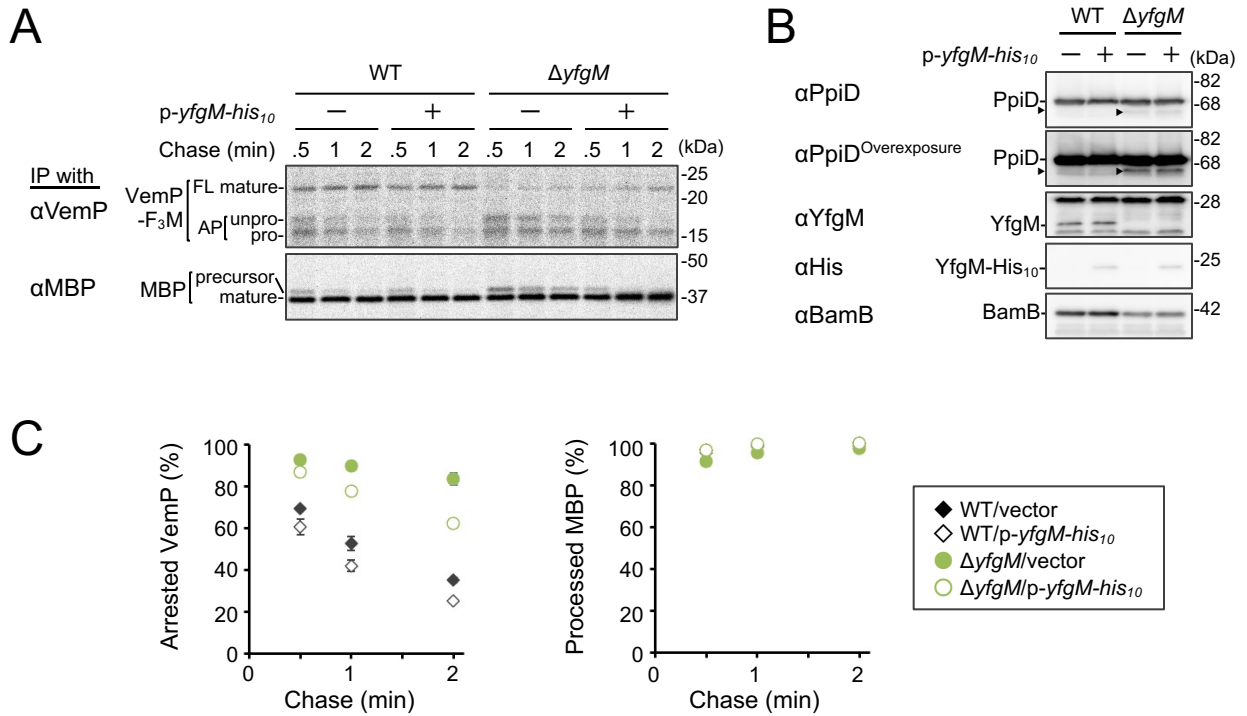

**Figure S4. YfgM expression suppresses the VemP translation arrest-release defect in  $\Delta$ *yfgM* cells.** *A*, NT17 derived cells carrying pSTD343(*lacI<sup>q</sup>*), pHM1021-*vemP-f<sub>3</sub>m*, and either pMW118 or pMW118-*yfgM-his<sub>10</sub>* were grown at 30 °C in M9-based medium until early log phase, induced with 1 mM IPTG for 15 min, pulse-labeled with [<sup>35</sup>S]Met for 30 s and chased for the indicated periods. At each time point, total cellular proteins were acid-precipitated, subjected to IP with anti-VemP or anti-MBP antibodies, and analyzed using SDS-PAGE followed by phosphorimaging. *B*, before radiolabeling, total cellular proteins were acid-precipitated from culture portions and analyzed using SDS-PAGE and immunoblotting with the indicated antibodies. Black arrowheads indicate PpiD degradation products (PpiD'). Some PpiD' was observed even in the  $\Delta$ *yfgM* cells expressing YfgM from the plasmid (fourth lane), likely because it was derived from YfgM-free PpiD molecules stably accumulated in the  $\Delta$ *yfgM* cells before the short induction (for 15 min) of YfgM. *C*, percentages of the arrested VemP and the processed MBP in *A* were calculated as in Figure S3. Average values of the arrest efficiency of VemP and the processing efficiency of MBP with S.D. (n = 2) are plotted against the chase time and shown as the left and right graphs, respectively. The short-time expression of YfgM-His<sub>10</sub> from the plasmid only partially suppressed the defect of the arrest-cancellation of VemP in the  $\Delta$ *yfgM* cells. It is presumably due to a lower accumulation level of YfgM-His<sub>10</sub> (as compared with the results in Figure 1C), which was supported by the results (shown in *B*) that it was immuno-detectable with anti-His-tag antibodies (higher reactivity), but not with anti-YfgM antibodies (lower reactivity).

# Figure S5

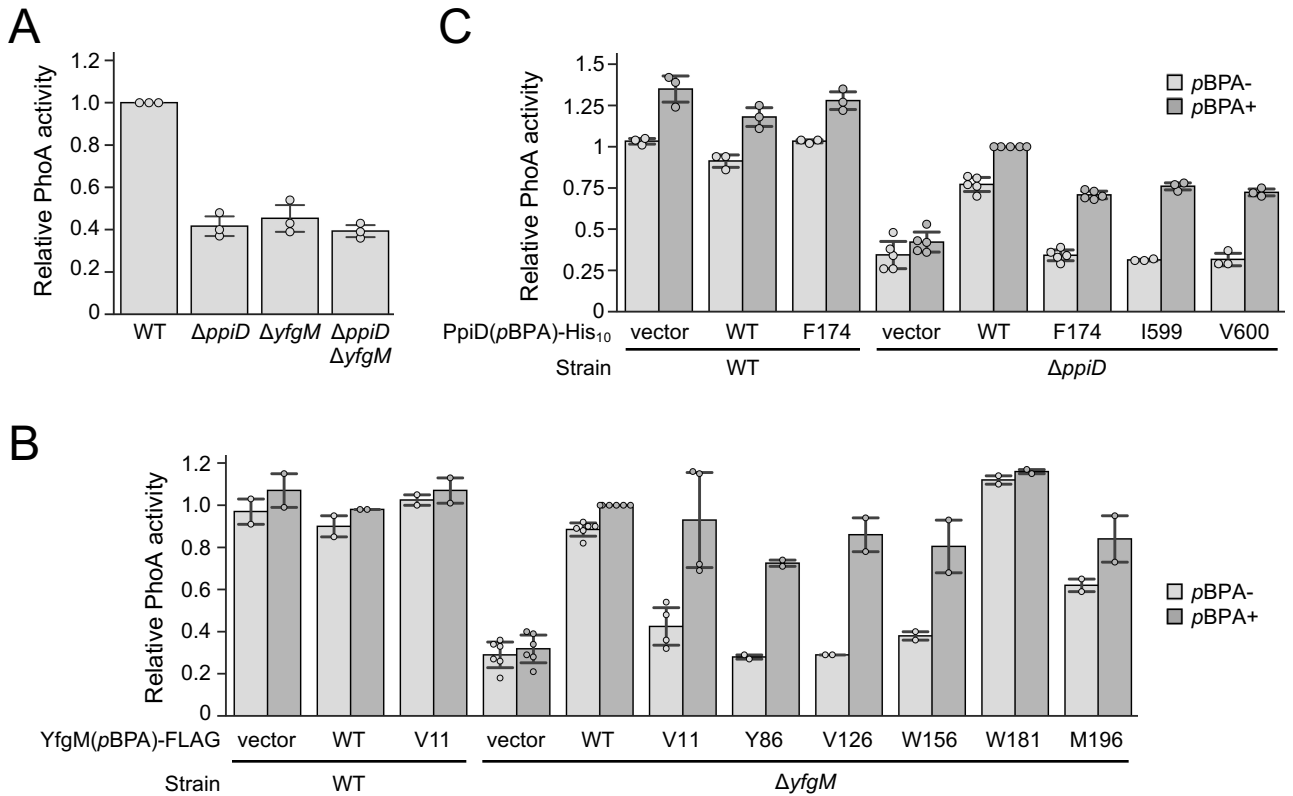

**Figure S5. Monitoring of VemP-arrest cancellation using a VemP-PhoA reporter system.** *A*, PhoA activity of the *yfgM* or *ppiD* mutant strain expressing VemP-PhoA reporter proteins. NT17 derivative cells carrying pHM1550-*vemP-phoA* were grown at 30 °C in LB-medium containing 1 mM IPTG for 2.5 h to express VemP-PhoA. PhoA activity was measured according to the method described in the EXPERIMENTAL PROCEDURES. Activity is shown relative to that of the wild-type strain ( $n = 3$ ,  $\pm$  S.D.). *B*, PhoA activity of cells expressing the YfgM( $\rho$ BPA) variants. NT17 (WT) or NT35 ( $\Delta$ *yfgM*) cells carrying pEVOL- $\rho$ BpF, pHM1550-*vemP-phoA*, and pTWV228-*yfgM(amb)-flag* were grown at 30 °C in L-medium containing 1 mM IPTG with or without 0.5 mM  $\rho$ BPA for 3 h to express both the indicated YfgM( $\rho$ BPA) variants and VemP-PhoA. PhoA activity was measured according to the method described in the EXPERIMENTAL PROCEDURES. Activity is shown relative to that of wild-type YfgM-FLAG expressing cells cultured in the presence of  $\rho$ BPA ( $n \geq 2$ ,  $\pm$  S.D.). *C*, PhoA activity of cells expressing PpiD( $\rho$ BPA) variants. NT17 (WT) or RM3688 ( $\Delta$ *ppiD*) cells carrying pEVOL- $\rho$ BpF, pHM1550-*vemP-phoA*, and pHM1021-*ppiD(amb)-his<sub>10</sub>* were grown at 30 °C in LB-medium containing 1 mM IPTG and 0.02% arabinose with or without 0.5 mM  $\rho$ BPA for 3 h to express the indicated PpiD( $\rho$ BPA) variants and VemP-PhoA. PhoA activity was measured according to the method described in the EXPERIMENTAL PROCEDURES. Activity is shown relative to that of wild-type PpiD-*His<sub>10</sub>* expressing cells cultured in the presence of  $\rho$ BPA ( $n \geq 3$ ,  $\pm$  S.D.). All cells with plasmids carrying either *yfgM(amber)* or *ppiD(amber)* exhibited comparable PhoA activity to wild type *yfgM* or *ppiD* plasmid-harboring cells when cultivated in medium containing  $\rho$ BPA, indicating that all YfgM( $\rho$ BPA) and PpiD( $\rho$ BPA) derivatives were functional. The PhoA activities of cells expressing either YfgM( $\rho$ BPA) and PpiD( $\rho$ BPA) derivatives were comparable to those of the wild type cells with or without the expression of either wild type PpiD, wild type YfgM or their  $\rho$ BPA derivatives, strongly suggesting that only the PpiD/YfgM complex can mediate the TTA of VemP-PhoA, and the presence of an excess amount of free (un-complexed) YfgM or PpiD little affects it. Cells with a plasmid carrying either *yfgM(W181amber)* or *yfgM(M196amber)* had significantly higher PhoA activity, even in the absence of  $\rho$ BPA, compared to cells carrying the other *yfgM(amber)*, suggesting that small C-terminal region truncations do not dramatically reduce YfgM's activity.

# Figure S6

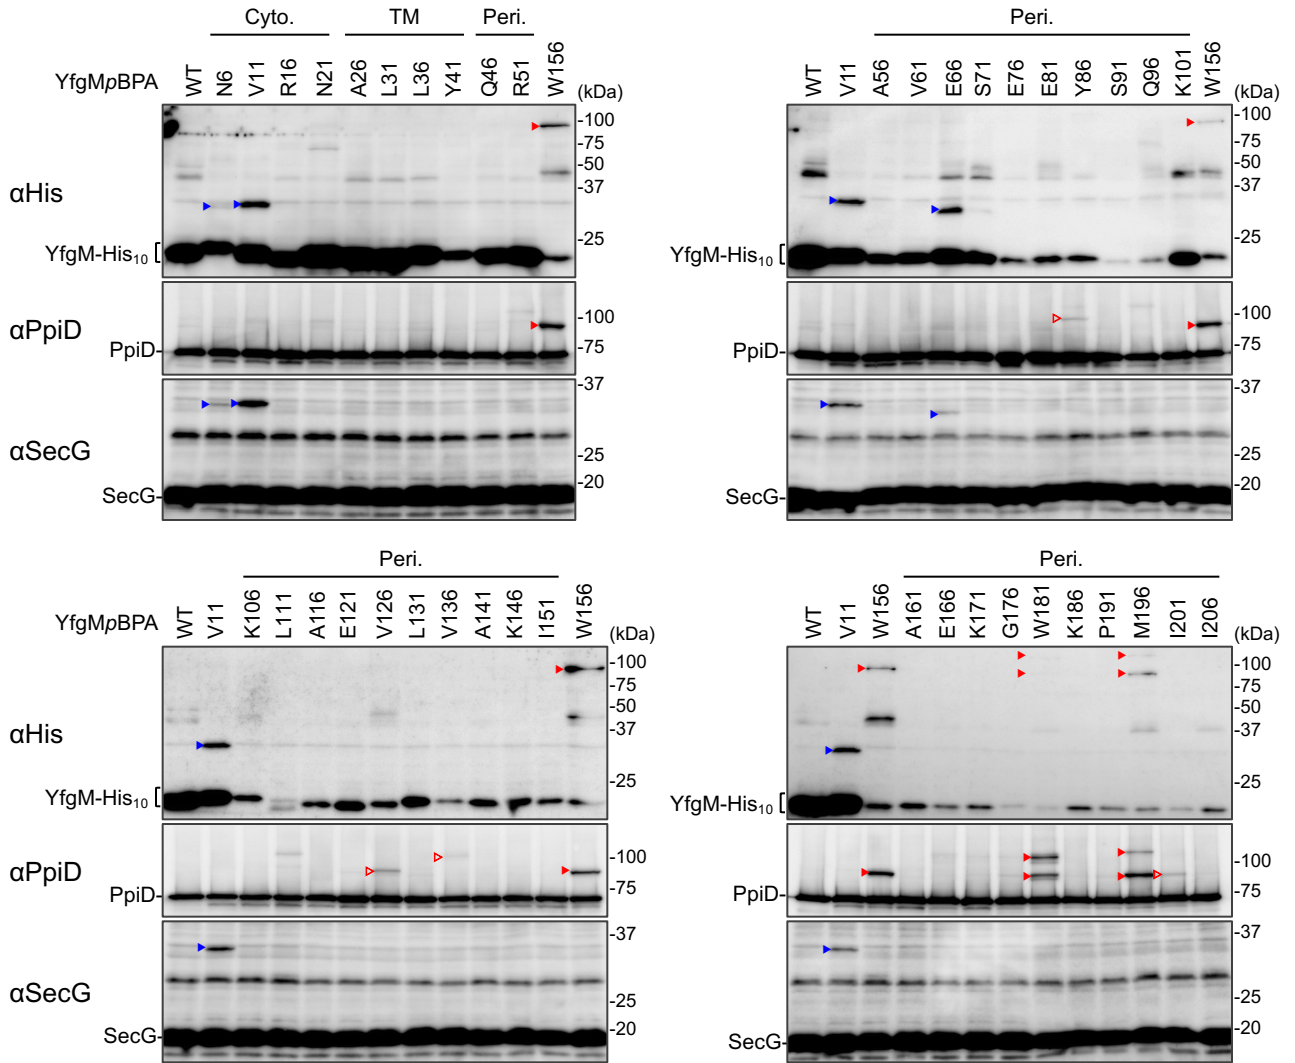

**Figure S6. Systematic *in vivo* photo-crosslinking analysis of YfgM.** NT35 ( $\Delta yfgM$ ) cells carrying both pEVOL-pBpF and pMW118-*yfgM(amb)-his<sub>10</sub>* were grown at 30 °C in L-medium containing 0.5 mM *pBPA* until early log phase and induced with 1 mM IPTG for 1 h to express the indicated YfgM(*pBPA*) variants. After UV-irradiation for 10 min at 4 °C, total cellular proteins were acid-precipitated and analyzed using SDS-PAGE and immunoblotting with the indicated antibodies. YfgM-PpiD and YfgM-SecG crosslinked products are shown as red and blue arrowheads, respectively. YfgM-PpiD crosslinked products detected using both anti-His tag and anti-PpiD antibodies and those detected using only anti-PpiD antibodies are represented by closed and open arrowheads, respectively.

# Figure S7

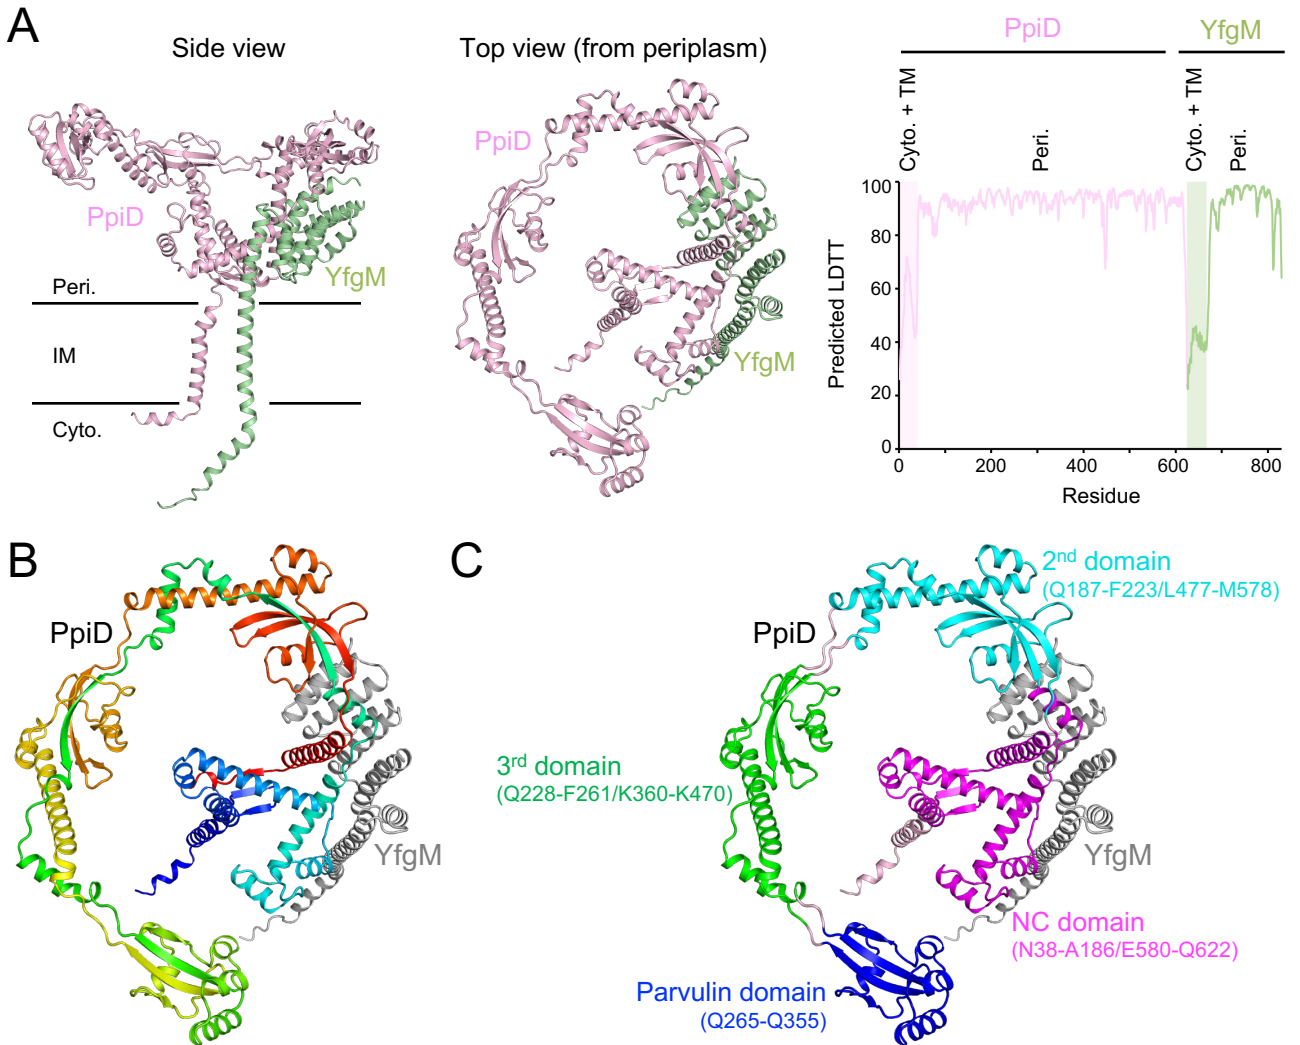

**Figure S7. Structural model of the PpiD/YfgM heterodimer predicted using AlphaFold2.** *A*, ribbon representation of the predicted structure of an *E. coli* PpiD/YfgM heterodimer. PpiD and YfgM are indicated in pink and pale green, respectively. A local distance difference test (LDDT) of the predicted PpiD/YfgM heterodimer model is plotted against the YfgM and PpiD sequences. Horizontal axis: consecutive residue numbers in which the PpiD amino acid sequence is followed by that of YfgM. *B*, rainbow representation of the PpiD molecule in the complex. Colors from blue to red indicate the topology from the N- to the C-terminus. YfgM is indicated in gray. *C*, domain structures of PpiD in the complex. The periplasmic region, NC domain, 2<sup>nd</sup> domain, 3<sup>rd</sup> domain, and Parvulin domain are indicated in magenta, cyan, green, and blue, respectively.





# Figure S9

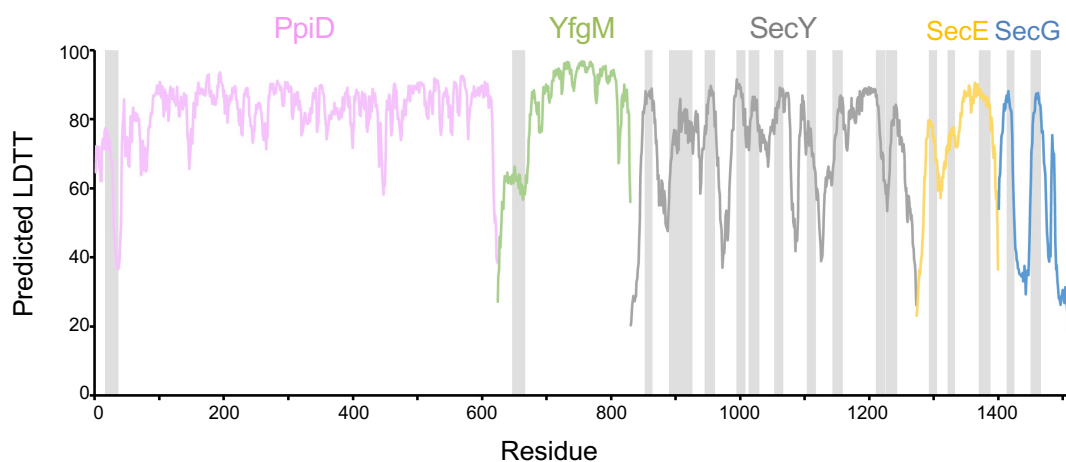

**Figure S9. Local distance difference test (LDDT) of the predicted PpiD/YfgM-SecY/E/G super-complex.** The LDDT of the predicted model of the PpiD/YfgM-SecY/E/G super complex is plotted against the amino acid residue positions along the PpiD, YfgM, SecY, SecE, and SecG sequences. Horizontal axis: consecutive residue numbers of the PpiD amino acid sequence followed by those of YfgM, SecY, SecE, and SecG. Regions corresponding to the TM segments of these proteins are shown as gray bars. Since the LDDT values of the regions in the model corresponding to all SecY TM segments, TM3 of SecE (functionally essential), and the two TMs of SecG were high, the membrane-embedded core structure of SecY/E/G appears sufficiently reliable.

# Figure S10

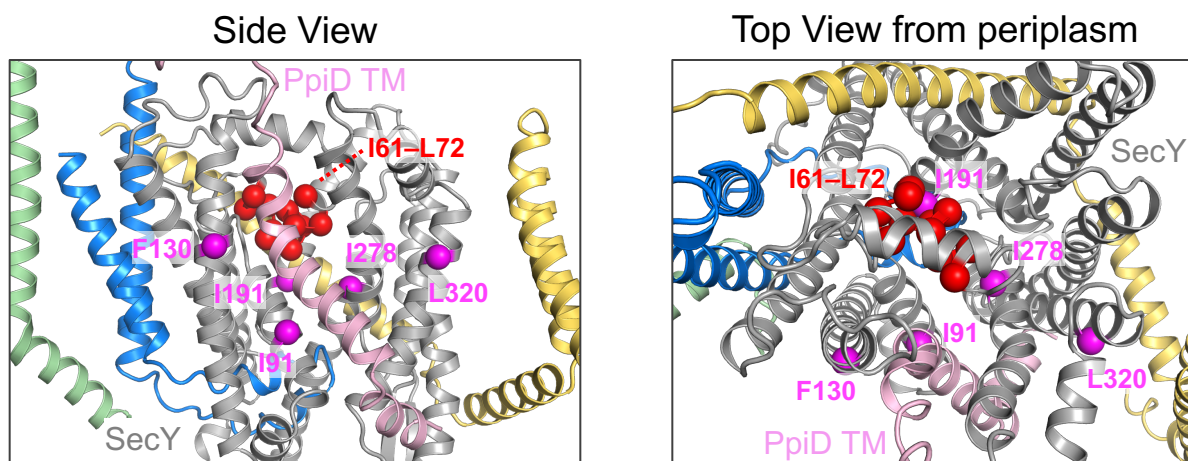

**Figure S10.** Close-up views of PpiD-crosslinking sites in SecY of the predicted PpiD/YfgM-SecY/E/G super-complex. The PpiD-neighbor residues in the TM regions (magenta) and the plug helix (red) of SecY are mapped on the model structure, and viewed from the front side of SecY/E/G (left) and the periplasmic side (right). SecY, SecE, SecG, PpiD and YfgM are colored in gray, yellow, blue, pink, and pale green, respectively.

# Figure S11

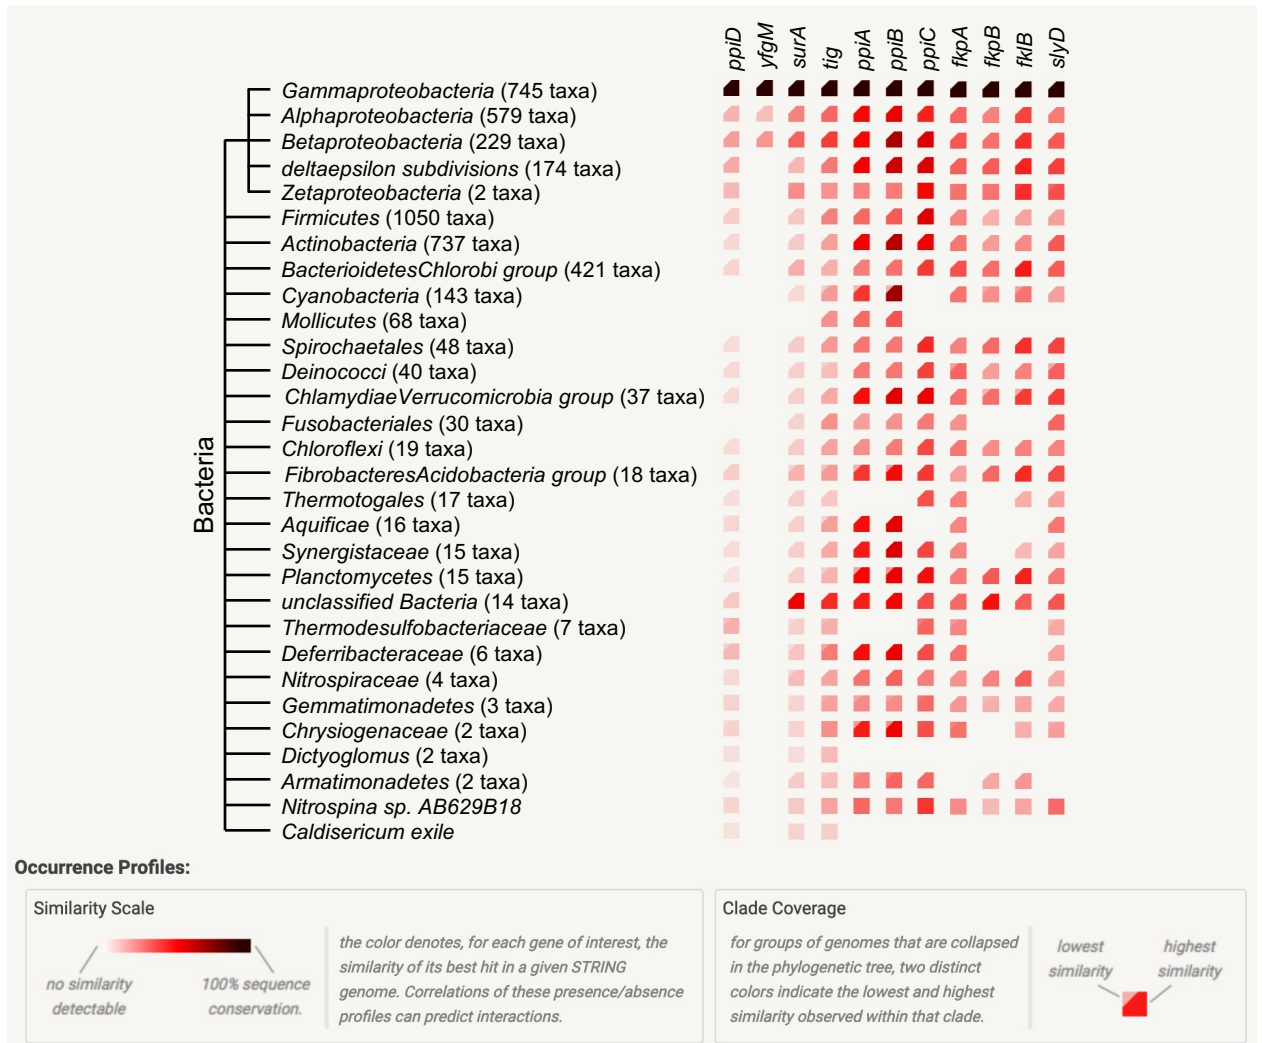

**Figure S11. Gene co-occurrence of *E. coli ppiD*, *yfgM*, and other PPIase genes.** Gene co-occurrence analysis for *E. coli ppiD*, *yfgM*, and other PPIases (*surA*, *tig*, *ppiA*, *ppiB*, *ppiC*, *fkpA*, *fkpB*, *fklB*, and *slyD*) was conducted using the STRING Database (<https://string-db.org/>).
